# Supplementary material for: Hydrothermal synthesis of a mineral-substituted hydroxyapatite nanocomposite material for fluoride removal from drinking water
Source: Royal Society of Chemistry journal article supplement (doi:10.1039/c8nj02401d), 2018-01-01
Supplement: c8nj02401d1.pdf [file c8nj02401d1.pdf]

## Hydrothermal synthesis of mineral-substituted hydroxyapatite nanocomposite material for fluoride removal from drinking water

Ammavasi Nagaraj<sup>a</sup>, Murugan A. Munsusamy<sup>b</sup>, Mukhtar Ahmed<sup>c</sup>, Subbaiah Suresh Kumar<sup>d</sup>,  
Mariappan Rajan\*

<sup>a</sup>\*Biomaterials in Medicinal chemistry Laboratory, Department of Natural Products chemistry  
School of Chemistry, Madurai Kamaraj University, Madurai, India.

<sup>b</sup>Department of Botany and Microbiology, College of Science, King Saud University, Riyadh  
11451, Saudi Arabia.

<sup>c</sup>Department of Zoology, College of Science, King Saud University, Riyadh 11451, Saudi  
Arabia.

<sup>d</sup>Department of Medical Microbiology and Parasitology, Universiti Putra, Malaysia.

### Supplementary Information (SI)

Figure 1(A) SEM image of HAp (B) EDAX graph of HAp.

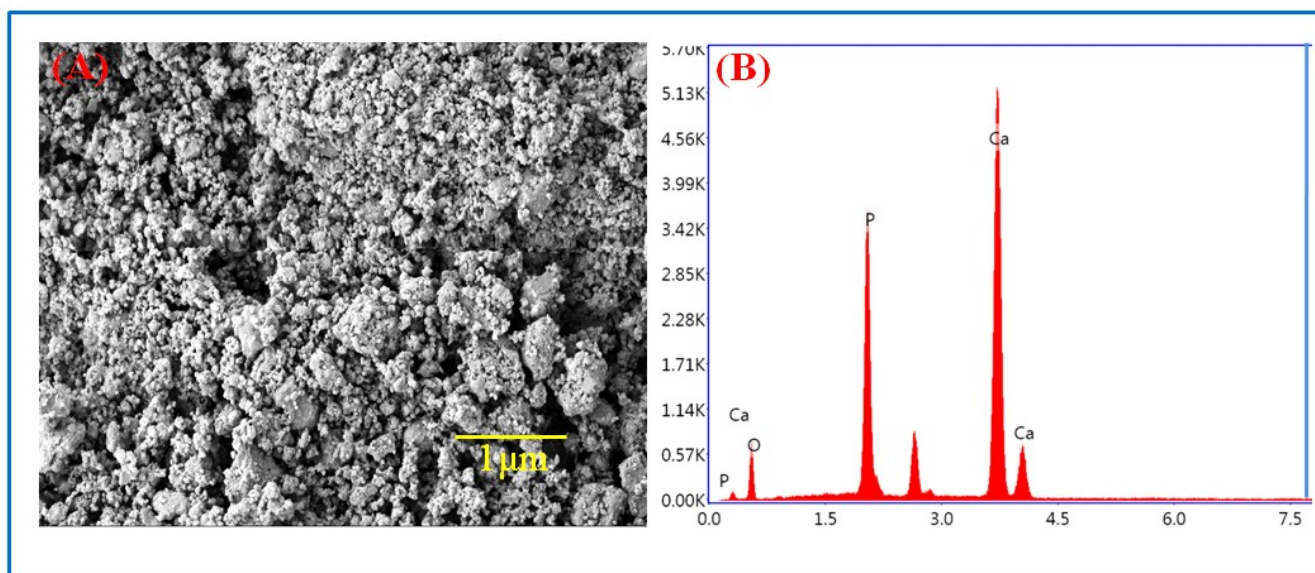

Figure 2. Dynamic Light Scattering (DLS, Particle size ) image of HAp

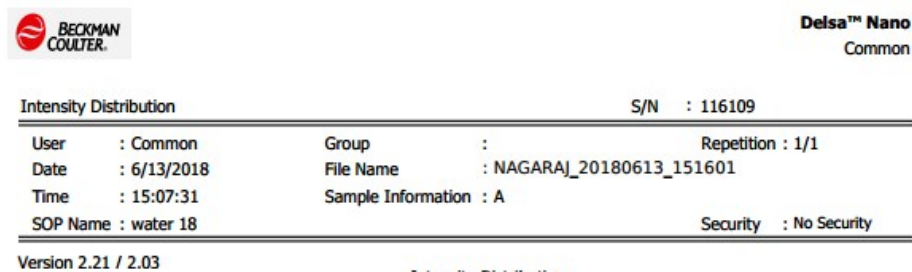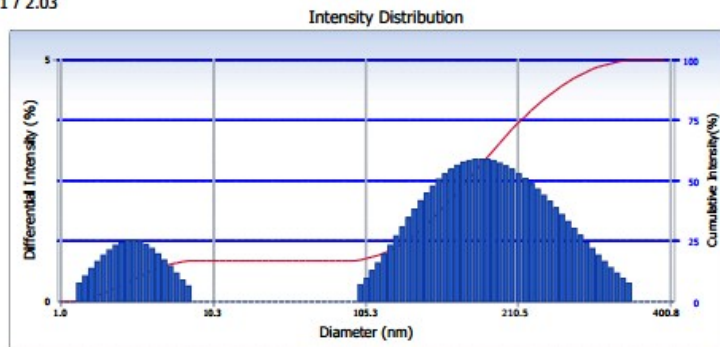

Figure 3. Dynamic Light Scattering (DLS, Particle size ) image of HAp

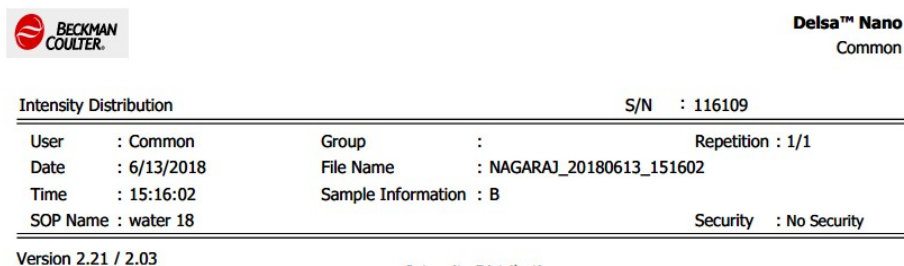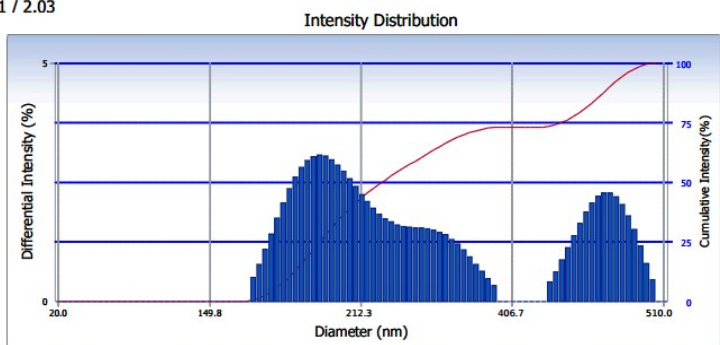

Figure 4. pH zero point charge (pH<sub>zpc</sub>) image of HAp

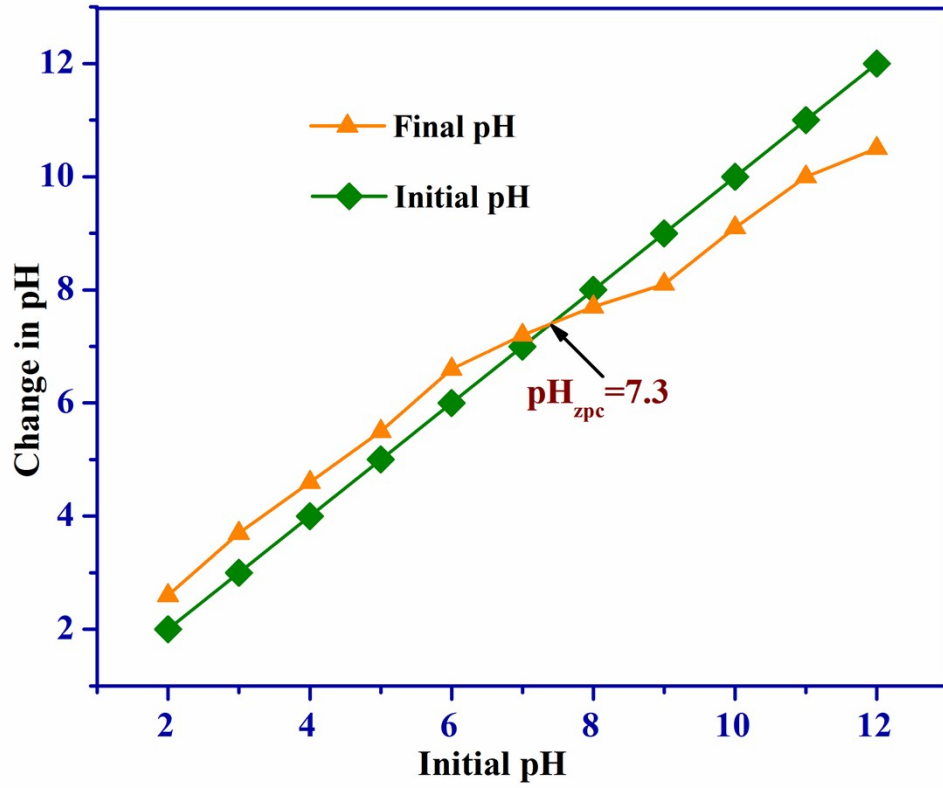

Table 1. Adsorption isotherm parameters of the mHAp nanocomposite adsorbent

| Isotherms             | Parameters                                                             | Temperature |        |        |
|-----------------------|------------------------------------------------------------------------|-------------|--------|--------|
|                       |                                                                        | 303 K       | 313 K  | 323 K  |
| Freundlich            | 1/n                                                                    | 0.1780      | 0.1872 | 0.2211 |
|                       | N                                                                      | 5.6052      | 5.3521 | 4.5201 |
|                       | $k_F(\text{mg}\cdot\text{g}^{-1}) (\text{L}\cdot\text{mg}^{-1})^{1/n}$ | 3.1872      | 3.3006 | 3.4041 |
|                       | R                                                                      | 0.9918      | 0.9997 | 0.9999 |
|                       | Sd                                                                     | 0.0074      | 0.0219 | 0.0246 |
|                       | $\chi^2$                                                               | 0.2021      | 0.3410 | 0.4232 |
| Langmuir              | $Q^\circ (\text{mg}\cdot\text{g}^{-1})$                                | 4.7081      | 4.9032 | 5.3789 |
|                       | $b (\text{L}\cdot\text{g}^{-1})$                                       | 1.7277      | 1.8113 | 1.5326 |
|                       | $R_L$                                                                  | 0.0344      | 0.0391 | 0.0212 |
|                       | R                                                                      | 0.9995      | 0.9975 | 0.9949 |
|                       | Sd                                                                     | 0.0137      | 0.0293 | 0.0341 |
|                       | $\chi^2$                                                               | 0.3891      | 0.8762 | 0.9785 |
| Dubnin – Radushkevich | $X_m (\text{mg}\cdot\text{g}^{-1})$                                    | 4.8271      | 4.7293 | 4.6751 |
|                       | $E (\text{kJ}\cdot\text{mol}^{-1})$                                    | 8.7261      | 9.2507 | 9.9031 |
|                       | R                                                                      | 0.9808      | 0.9317 | 0.9262 |
|                       | Sd                                                                     | 0.0250      | 0.0551 | 0.0654 |
|                       | $\chi^2$                                                               | 0.7659      | 1.4709 | 1.8203 |

**Table 2. Kinetic models and their estimated parameters for the mHAp nanocomposite adsorbent**

| Kinetic models          | Parameters                       | Temperature at 303 K |        |        |        |         |
|-------------------------|----------------------------------|----------------------|--------|--------|--------|---------|
|                         |                                  | 2 mg/g               | 4 mg/g | 6 mg/g | 8 mg/g | 10 mg/g |
| Pseudo-first-order      | $k_{ad}$ (min <sup>-1</sup> )    | 0.1461               | 0.1560 | 0.1173 | 0.1671 | 0.1752  |
|                         | R                                | 0.9969               | 0.9980 | 0.9912 | 0.9785 | 0.9531  |
|                         | Sd                               | 1.0993               | 1.0172 | 0.0918 | 1.0685 | 1.0721  |
| Pseudo-second-order     | $q_e$ (mg/g)                     | 2.3376               | 1.4409 | 1.2081 | 1.0133 | 1.3011  |
|                         | $k$ (g/mg min)                   | 0.2461               | 0.2524 | 0.3412 | 0.3423 | 0.3132  |
|                         | $h$ (mg/g min)                   | 3.9290               | 3.8169 | 3.7428 | 3.3421 | 3.3422  |
|                         | R                                | 0.9999               | 0.9999 | 0.9992 | 0.9995 | 0.9999  |
|                         | Sd                               | 0.0220               | 0.0172 | 0.0918 | 0.0685 | 0.0721  |
| Particle diffusion      | $k_p$ (min <sup>-1</sup> )       | 0.1530               | 0.1321 | 0.1412 | 0.1142 | 0.1317  |
|                         | R                                | 0.9891               | 0.9801 | 0.9968 | 0.9805 | 0.0981  |
|                         | Sd                               | 0.029                | 0.036  | 0.035  | 0.031  | 0.035   |
| Intraparticle diffusion | $k_i$ (mg/g min <sup>0.5</sup> ) | 0.1357               | 0.1345 | 0.1420 | 0.0390 | 0.0398  |
|                         | R                                | 0.9778               | 0.9730 | 0.9689 | 0.9765 | 0.9614  |
|                         | Sd                               | 0.0168               | 0.0379 | 0.0625 | 0.0855 | 0.0603  |

**Table 3 Thermodynamic parameters of the mHAp nanocomposite adsorbent**

| Temperature (K) | Thermodynamic parameters                 |                                          |                                                          |
|-----------------|------------------------------------------|------------------------------------------|----------------------------------------------------------|
|                 | $\Delta G^\circ$ (KJ mol <sup>-1</sup> ) | $\Delta H^\circ$ (KJ mol <sup>-1</sup> ) | $\Delta S^\circ$ (KJ mol <sup>-1</sup> K <sup>-1</sup> ) |
| 313             | -0.73                                    | 0.6301                                   | 2.6301                                                   |
| 323             | -0.91                                    |                                          |                                                          |
| 333             | -1.12                                    |                                          |                                                          |

**Table 4. Field study results for the adsorbent of mHAp and HAp nanocomposites.**

| Water quality parameters                          | Adsorbent mHAp |       | Adsorbent HAp |       |
|---------------------------------------------------|----------------|-------|---------------|-------|
|                                                   | Before         | After | Before        | After |
| Fluoride (mg L <sup>-1</sup> )                    | 2.42           | 0.51  | 2.42          | 0.91  |
| pH                                                | 7.3            | 6.9   | 7.3           | 6.7   |
| Chloride (mg L <sup>-1</sup> )                    | 443            | 272   | 443           | 290   |
| Sulfate (mg L <sup>-1</sup> )                     | 166            | 147   | 166           | 150   |
| Nitrate (mg L <sup>-1</sup> )                     | 47             | 31    | 47            | 35    |
| Bicarbonate (mg L <sup>-1</sup> )                 | 132            | 114   | 132           | 120   |
| Total Hardness (mg L <sup>-1</sup> )              | 493            | 371   | 493           | 380   |
| Total Dissolved Solids(TDS) (mg L <sup>-1</sup> ) | 256            | 223   | 256           | 233   |
| Electrical Conductivity (m Sm <sup>-1</sup> )     | 7.2            | 3.1   | 7.2           | 3.7   |
